# Supplementary material for: Ethanol Extract of Campsis grandiflora Flower and Its Organic Acid Components Have Inhibitory Effects on Autoinducer Type 1 Quorum Sensing
Source: MDPI journal article supplement (doi:10.3390/molecules25204727), 2020-10-15

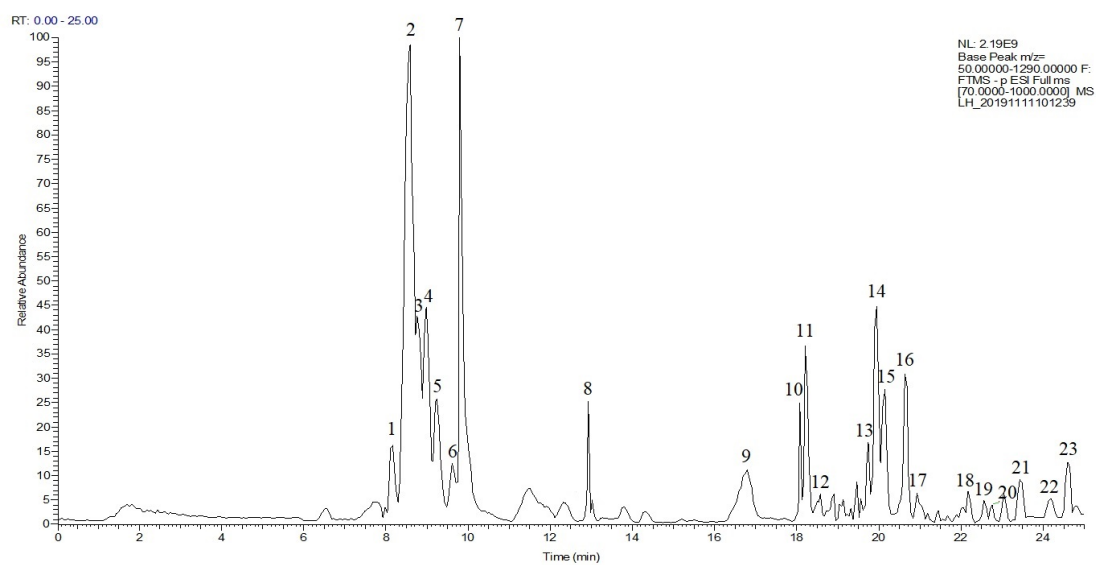

The total ion current of CFP identified by UHPLC-HESI-MS/MS

# Peak 1

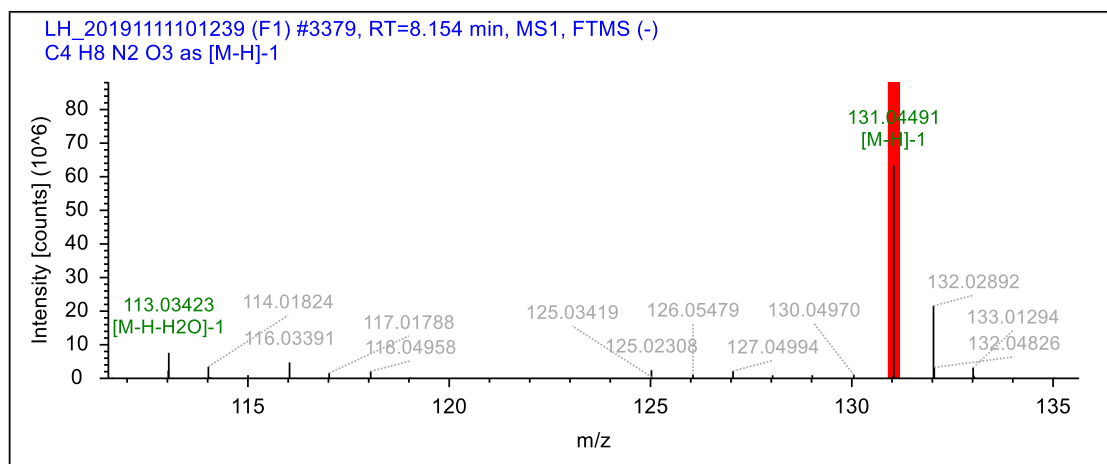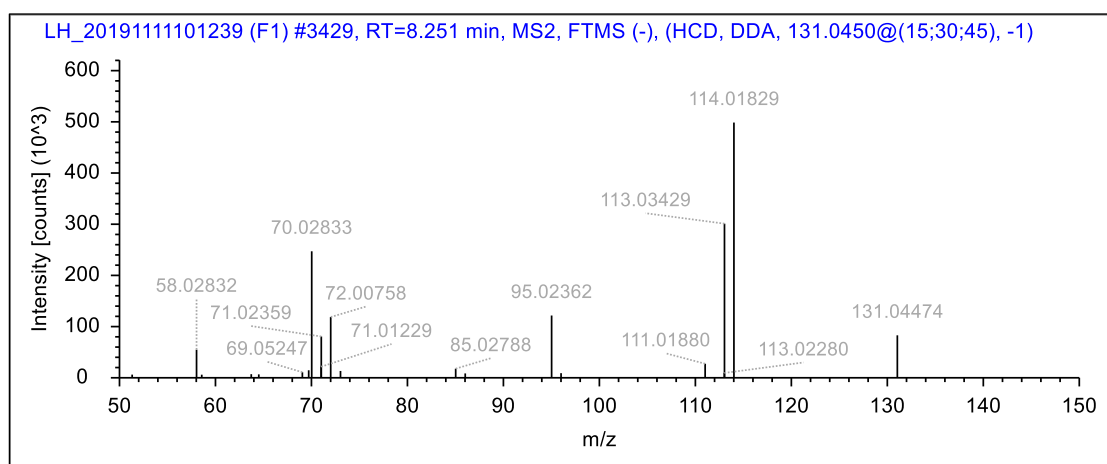

# Peak 2

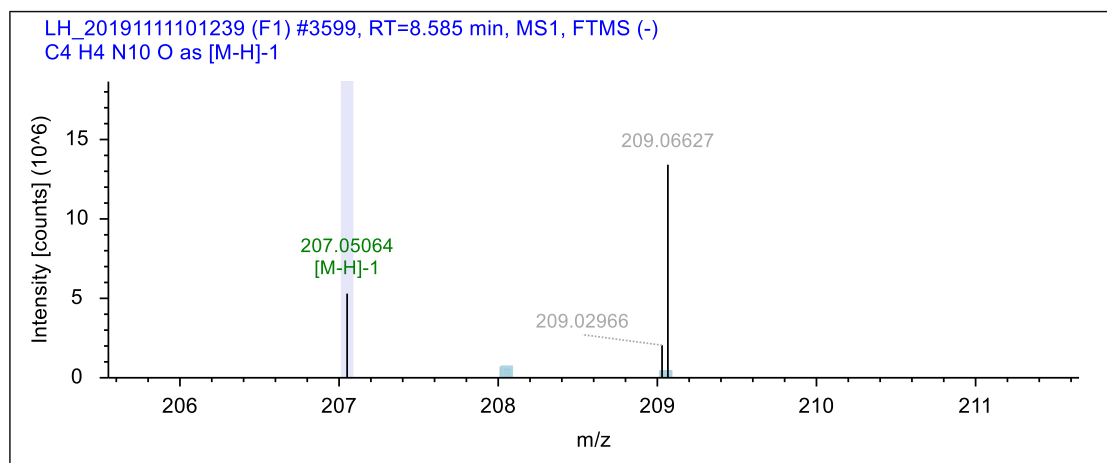

### Peak 3

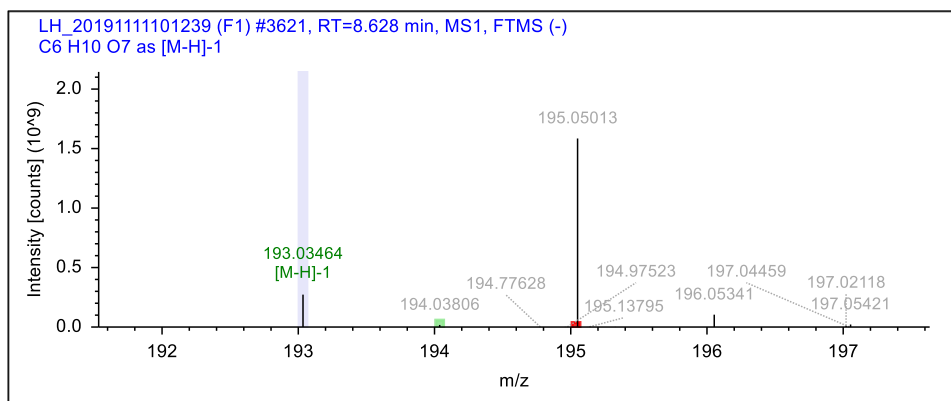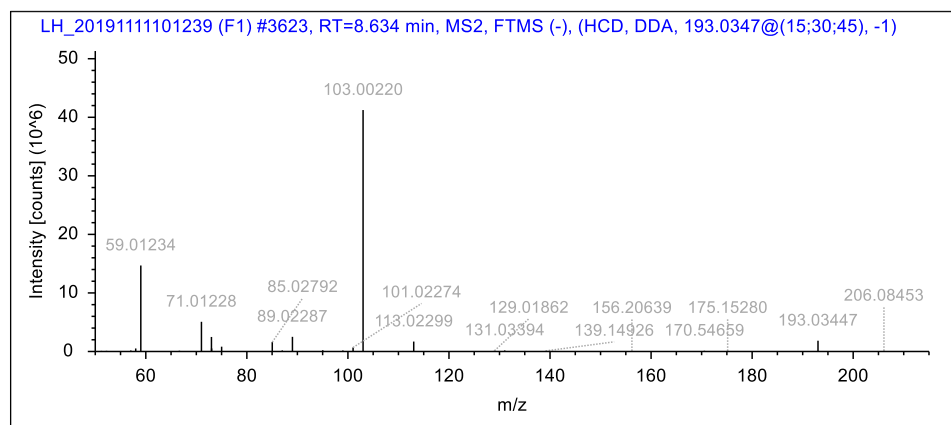

### Peak 4

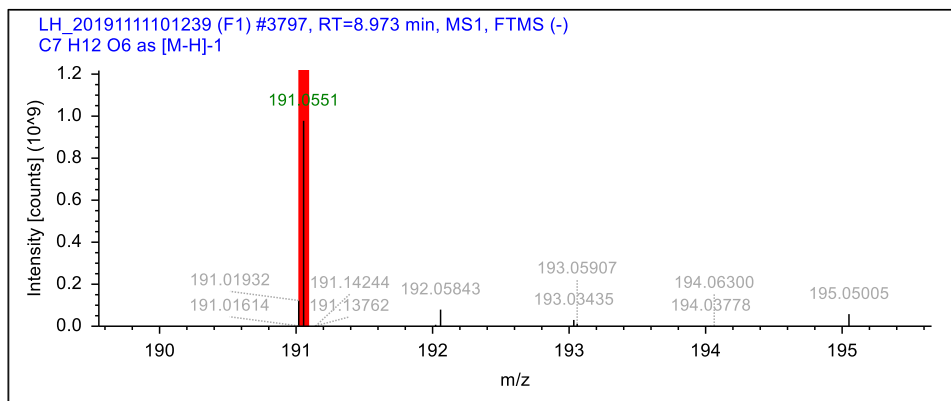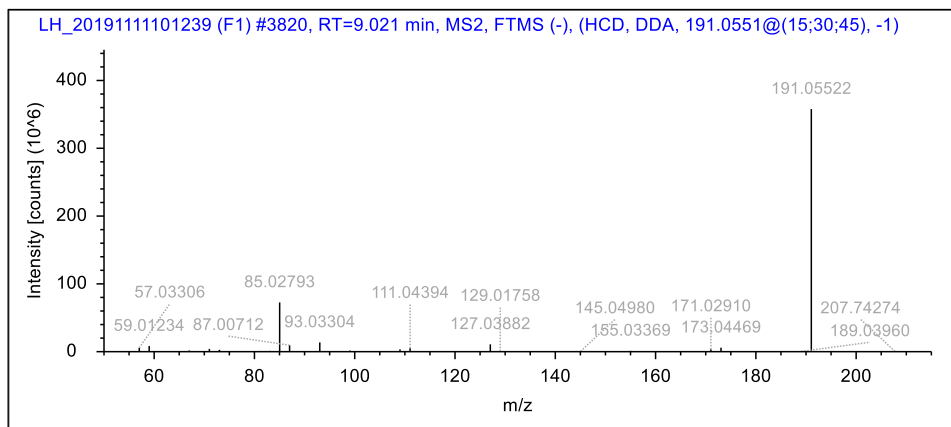

## Peak 5

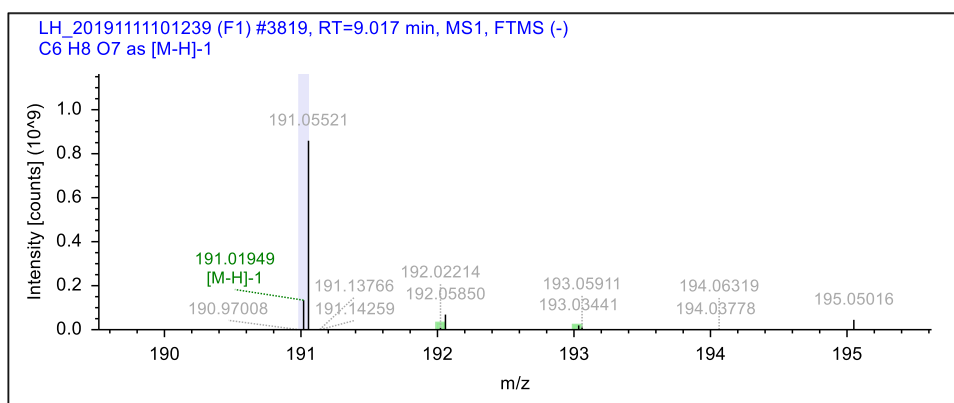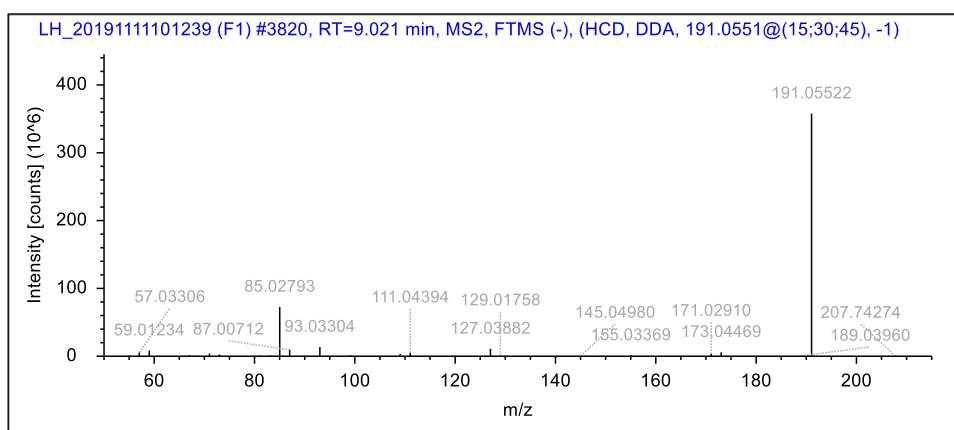

## Peak 6

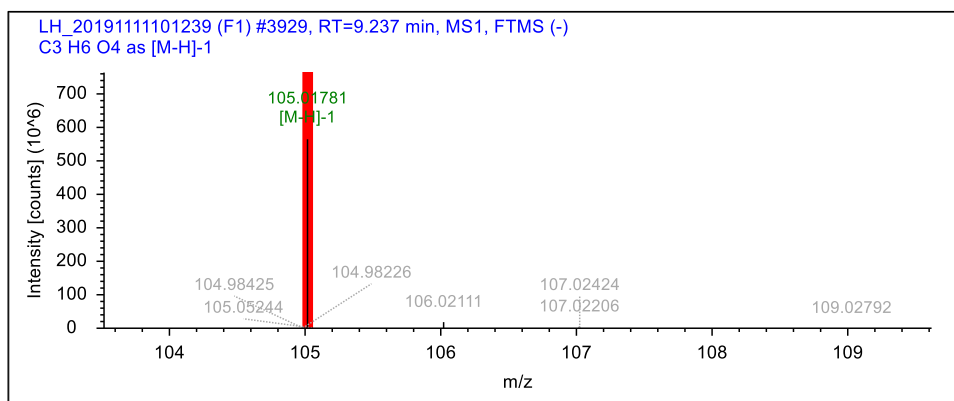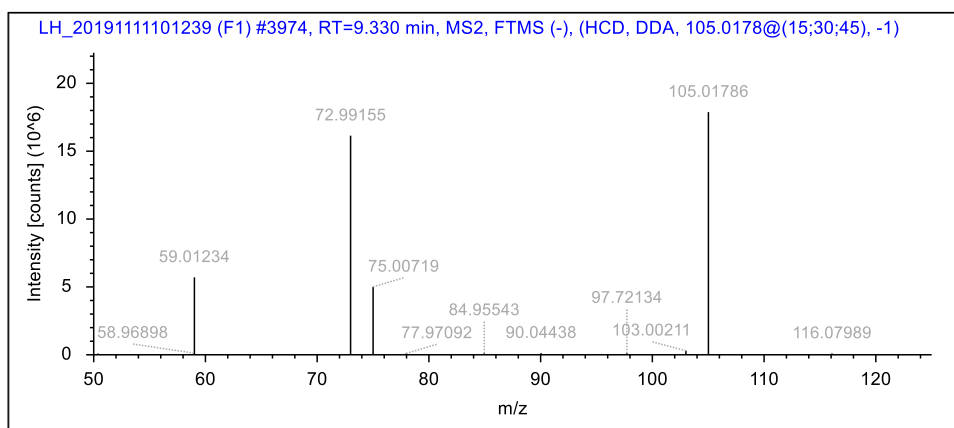

## Peak 7

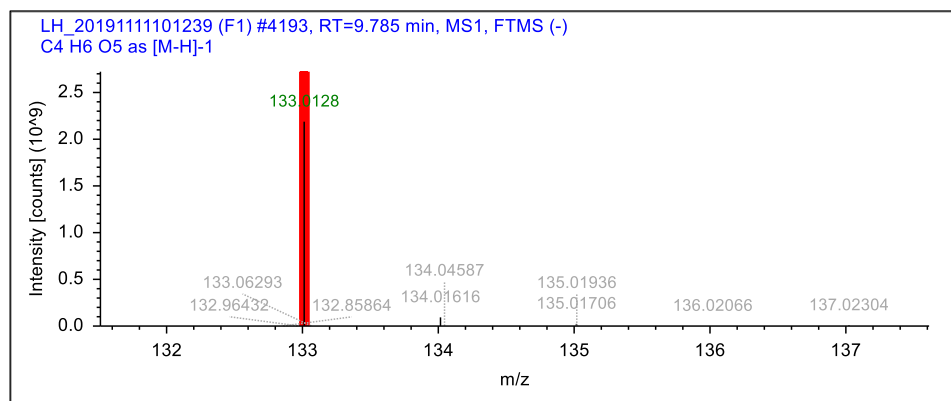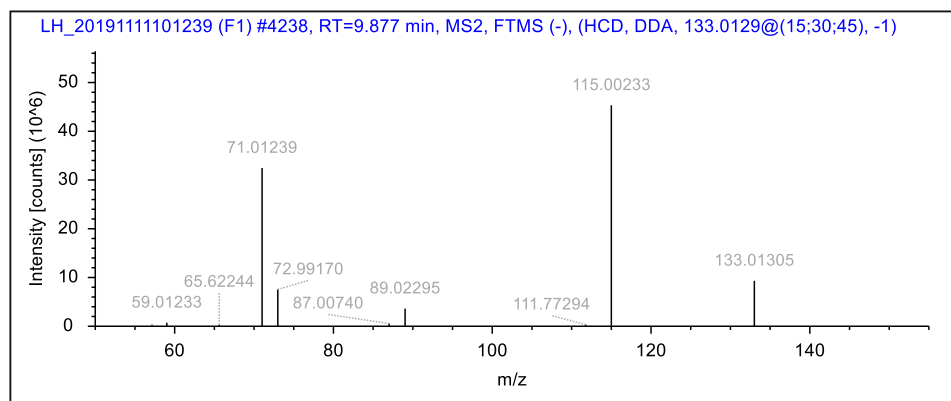

## Peak 8

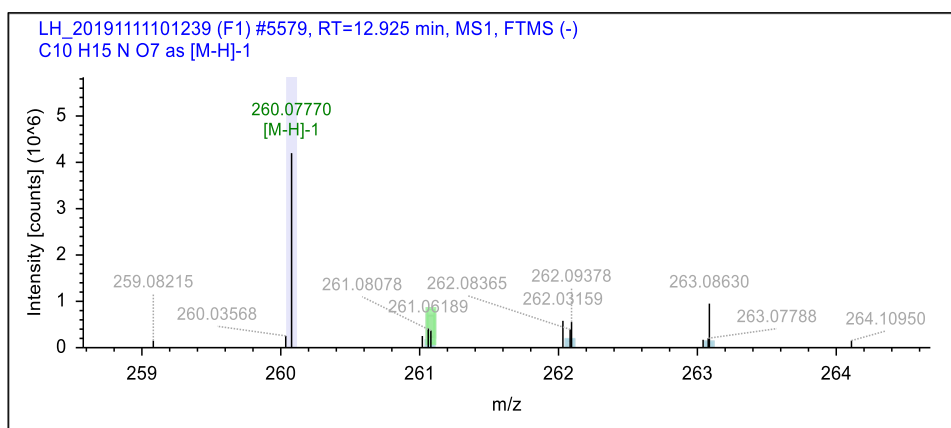

# Peak 9

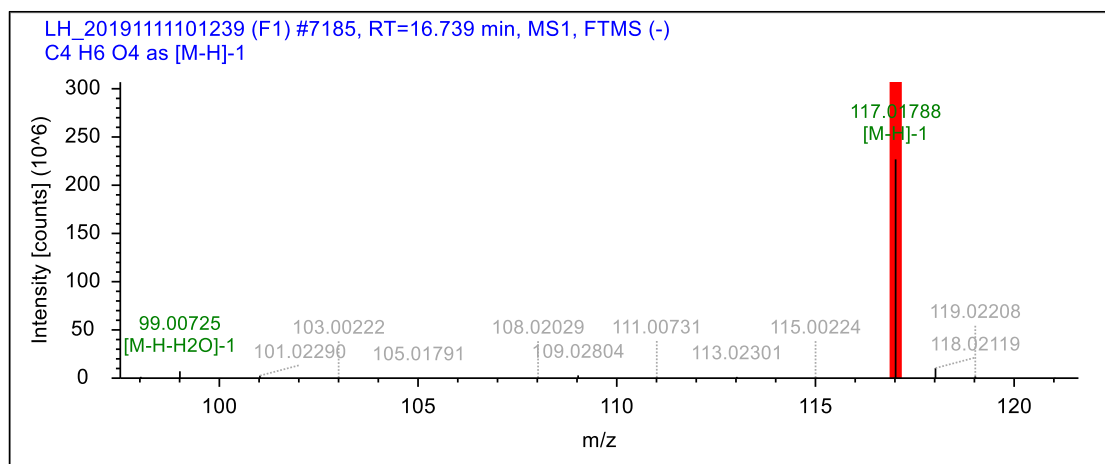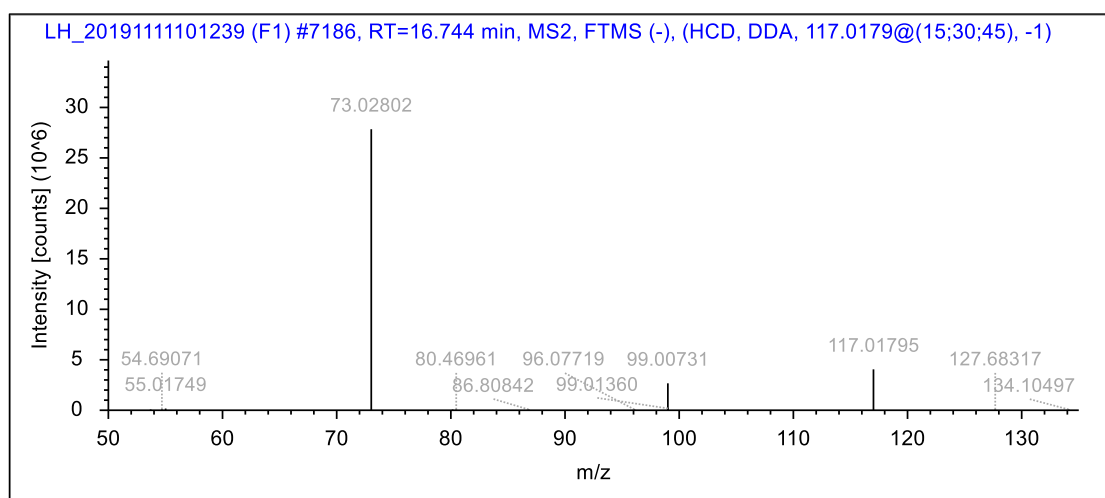

# Peak 10

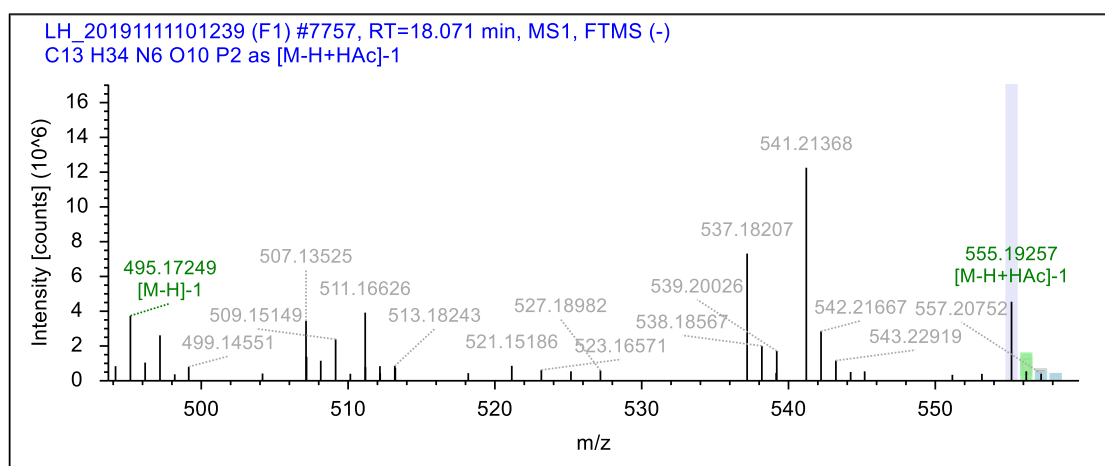

# Peak 11

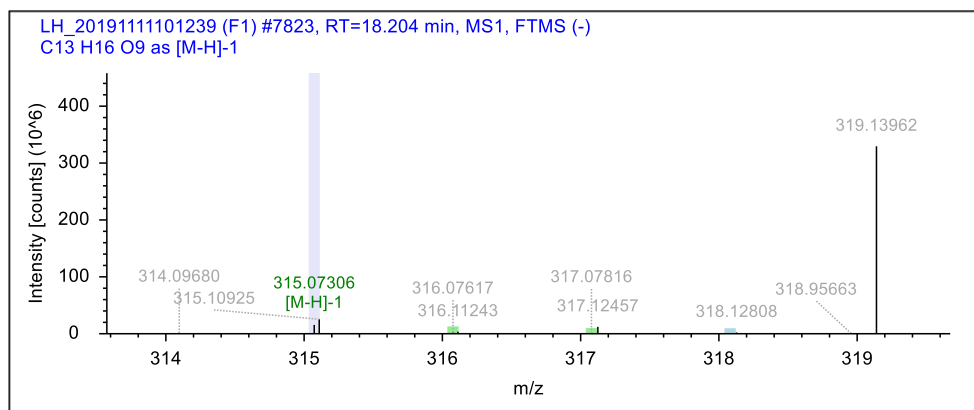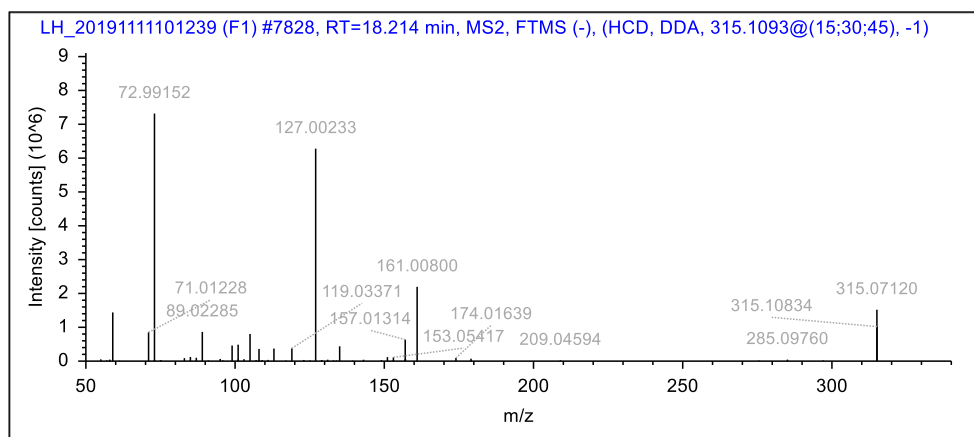

# Peak 12

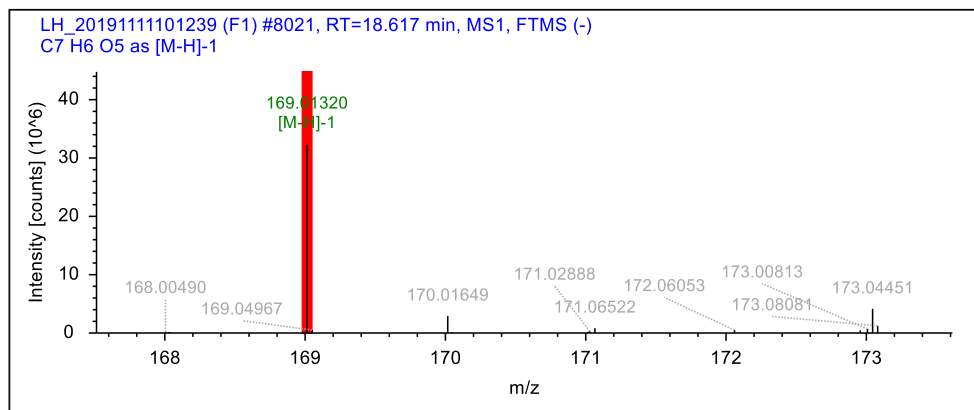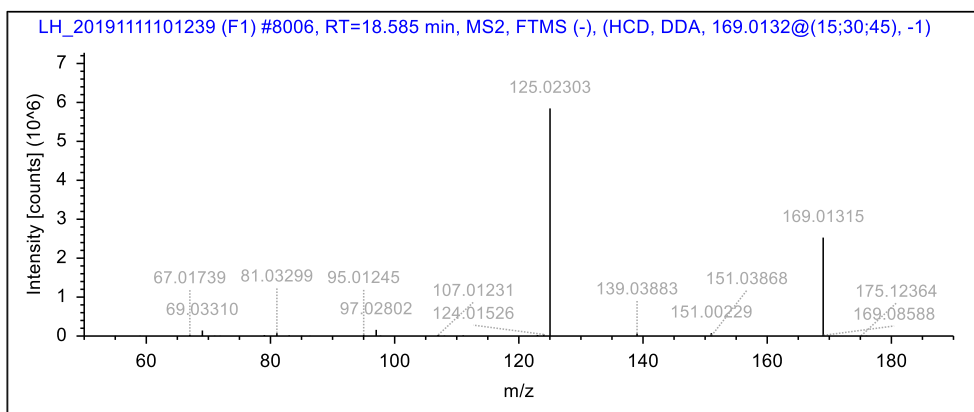

# Peak 13

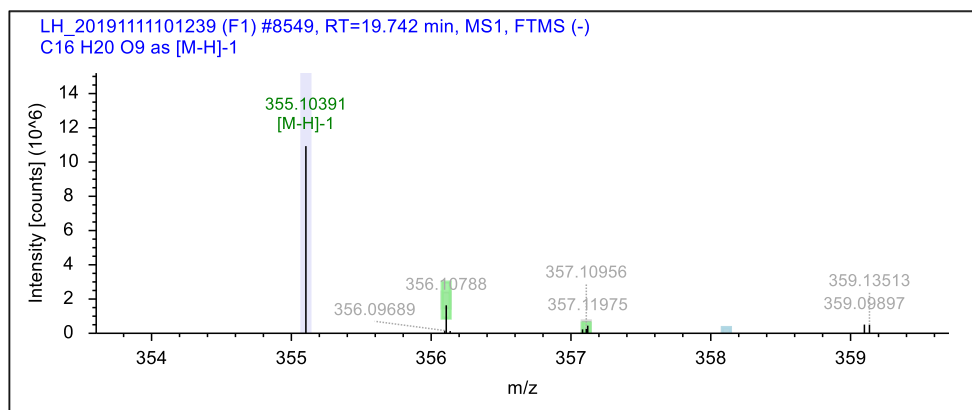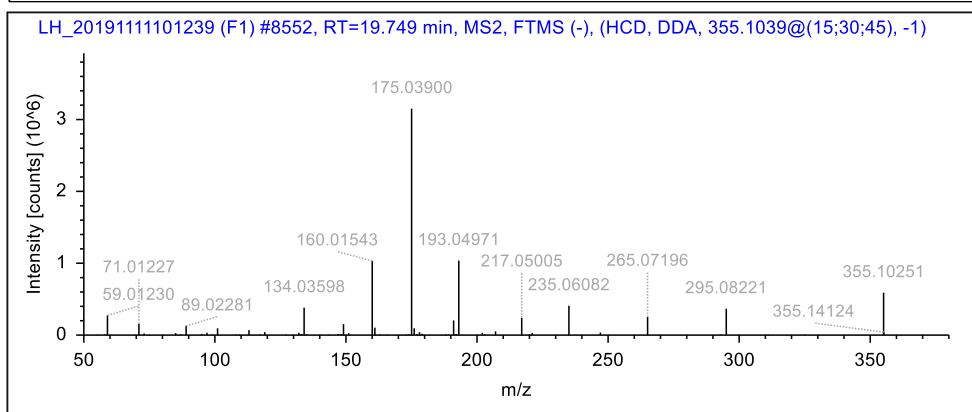

# Peak 14

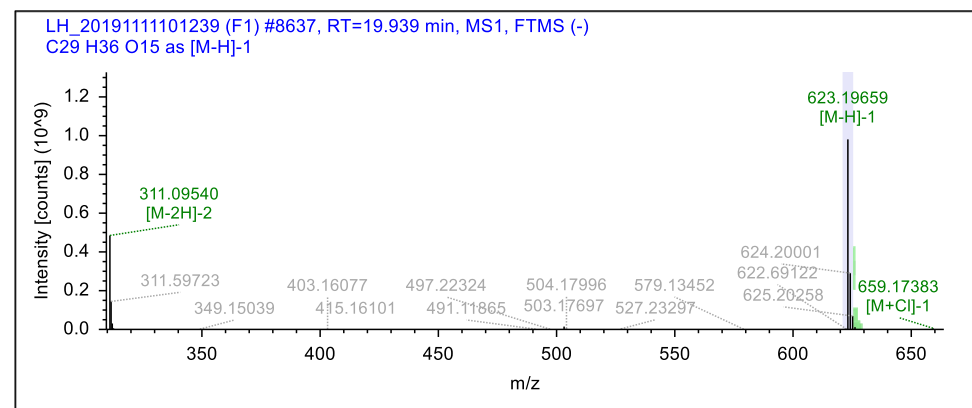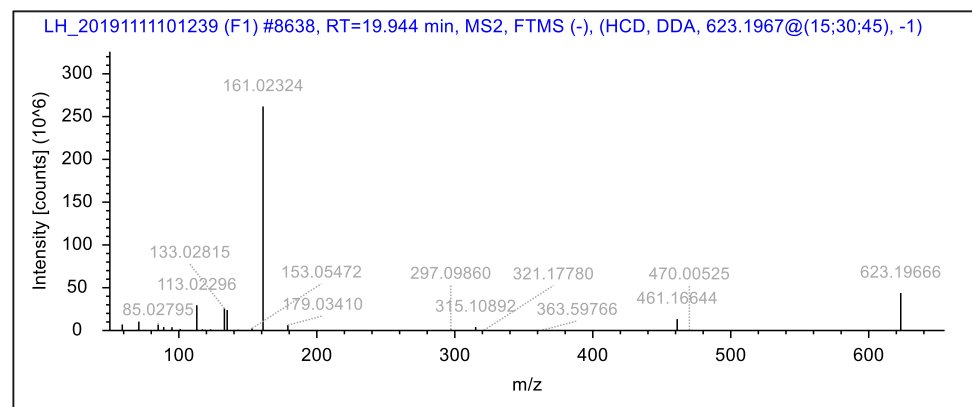



# Peak 15

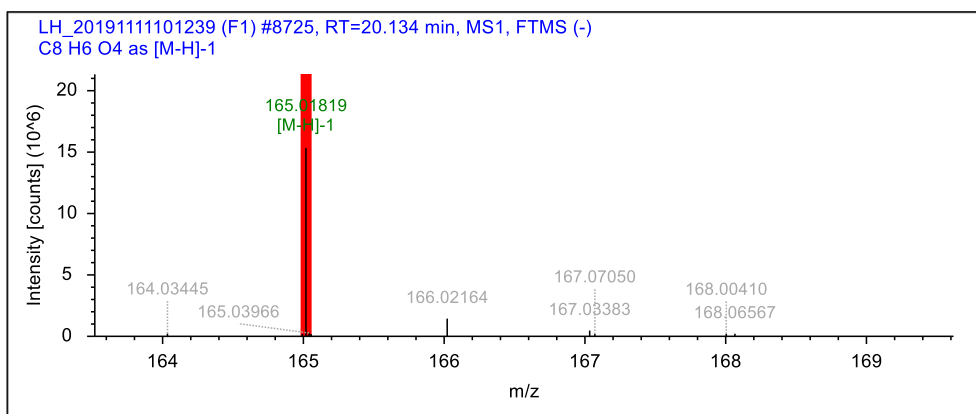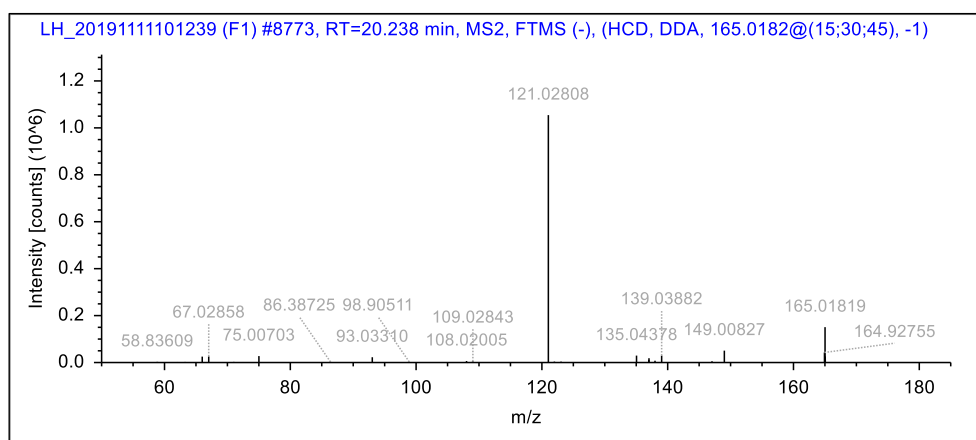

# Peak 16

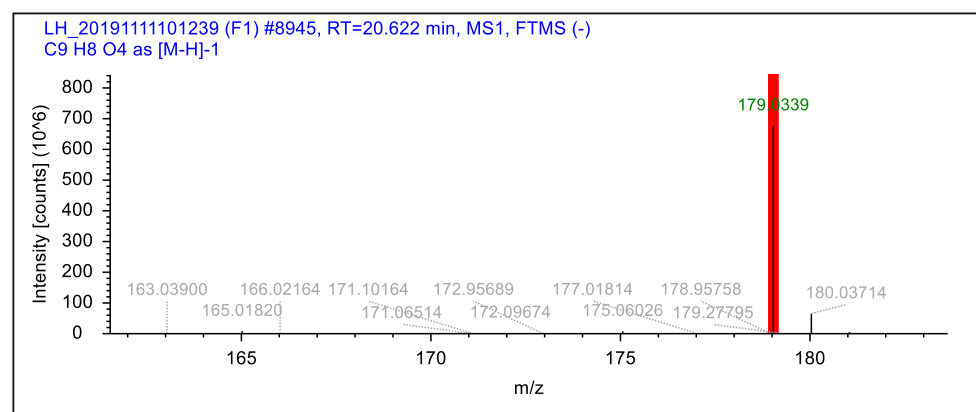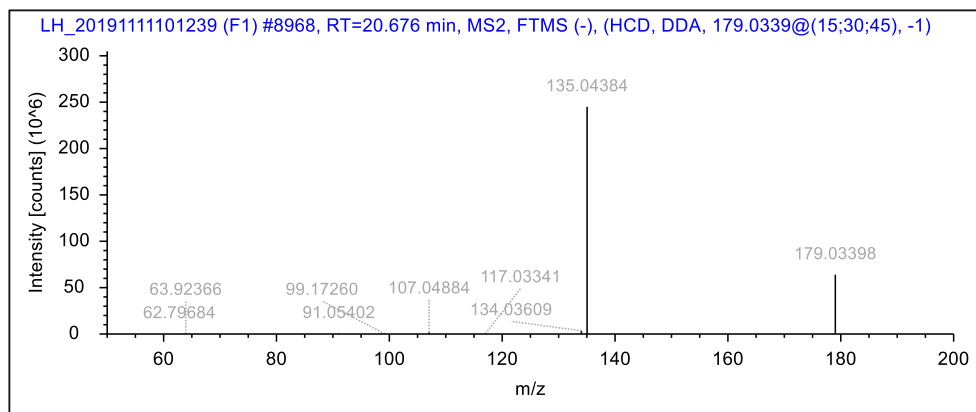

# Peak 17

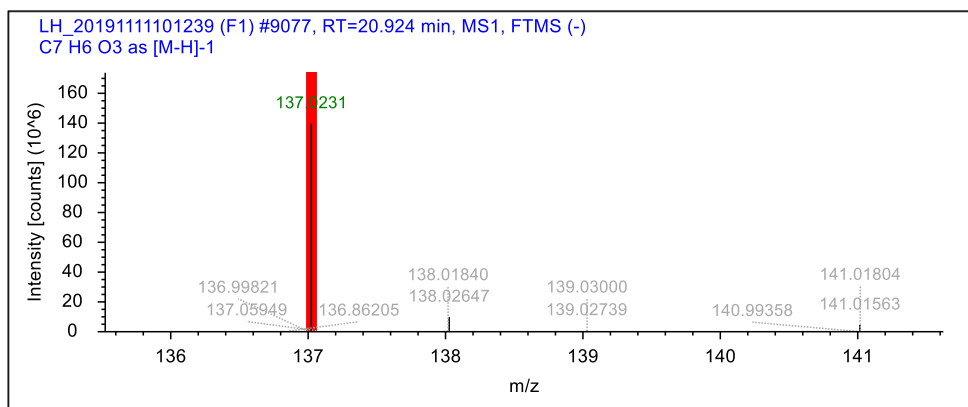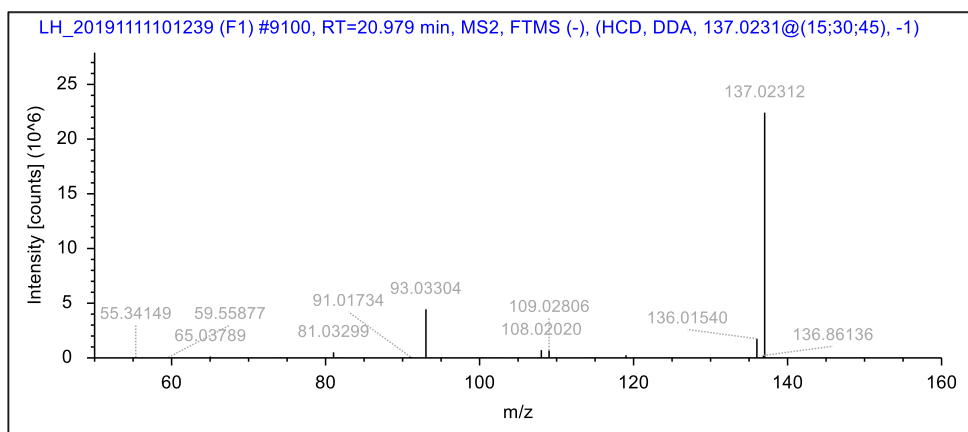

# Peak 18

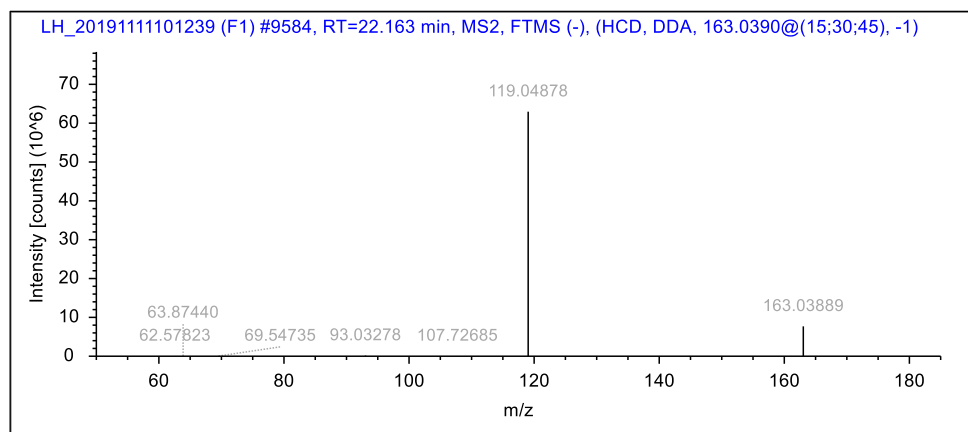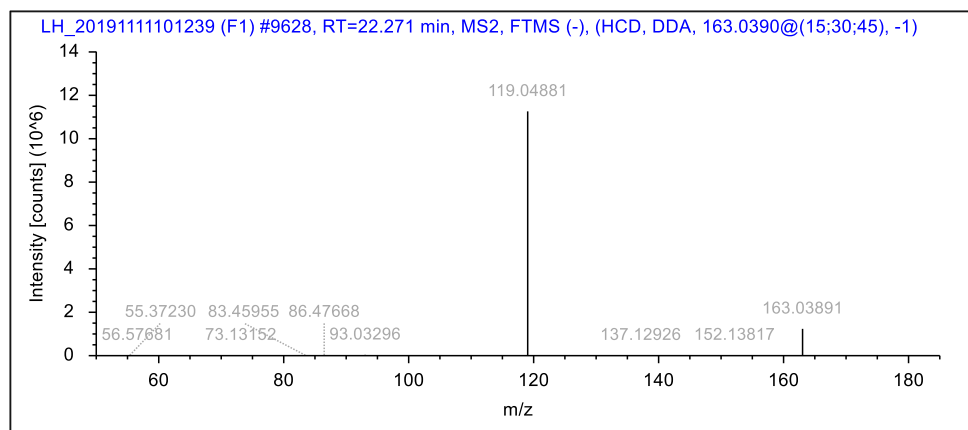

## Prak 19

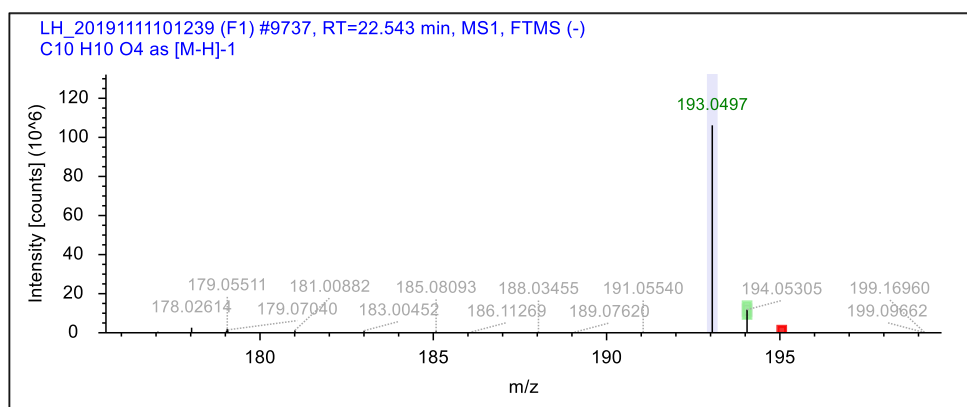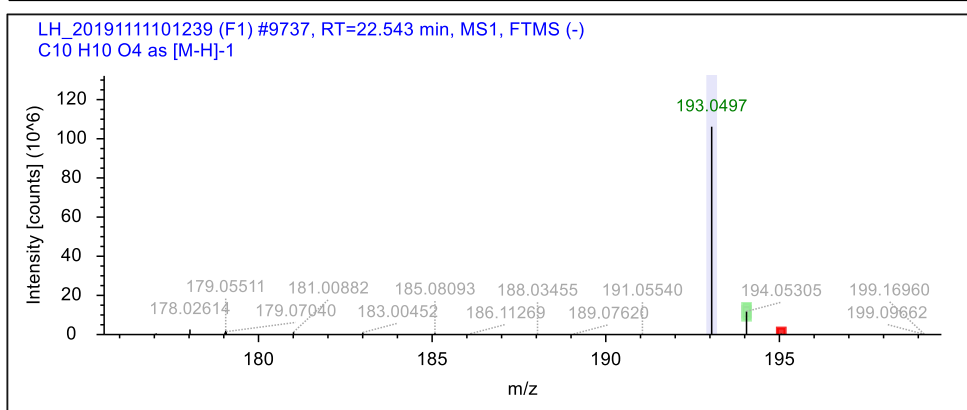

## Peak 20

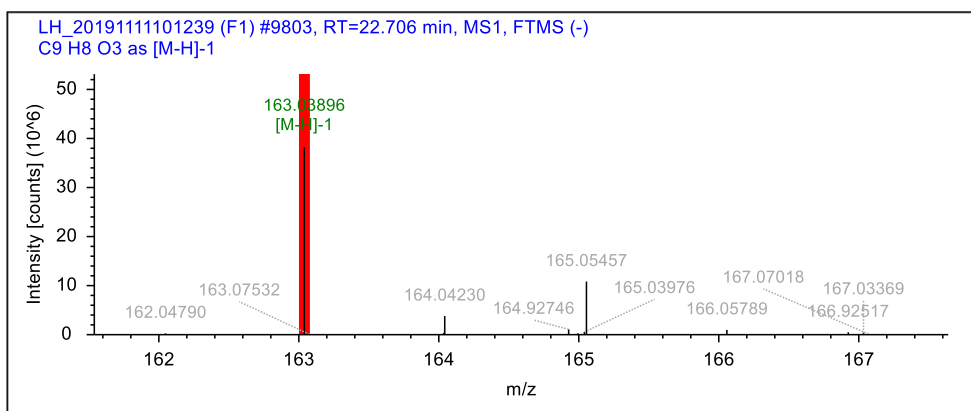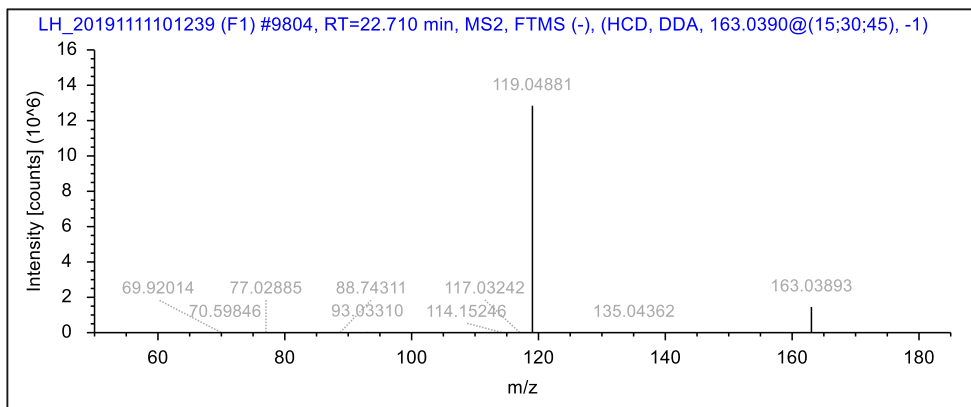

# Peak 21

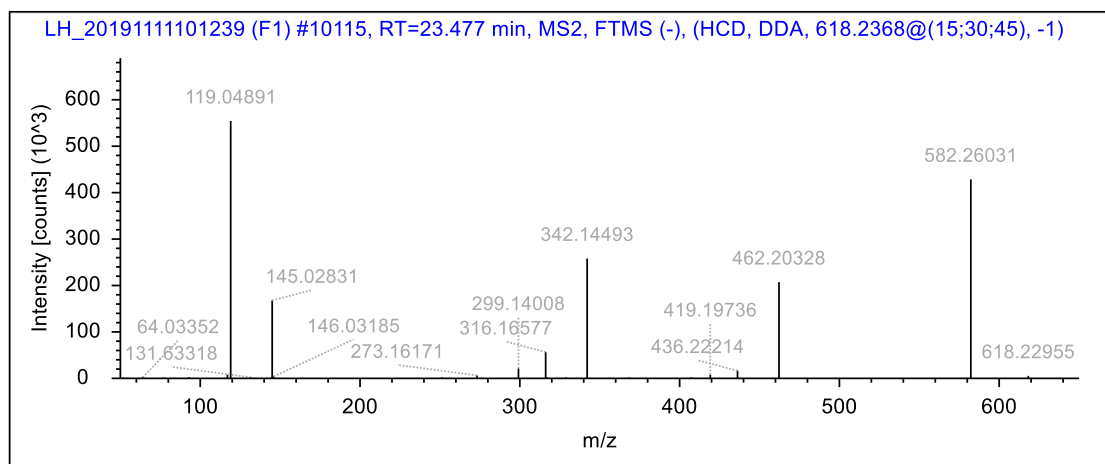

# Peak 22

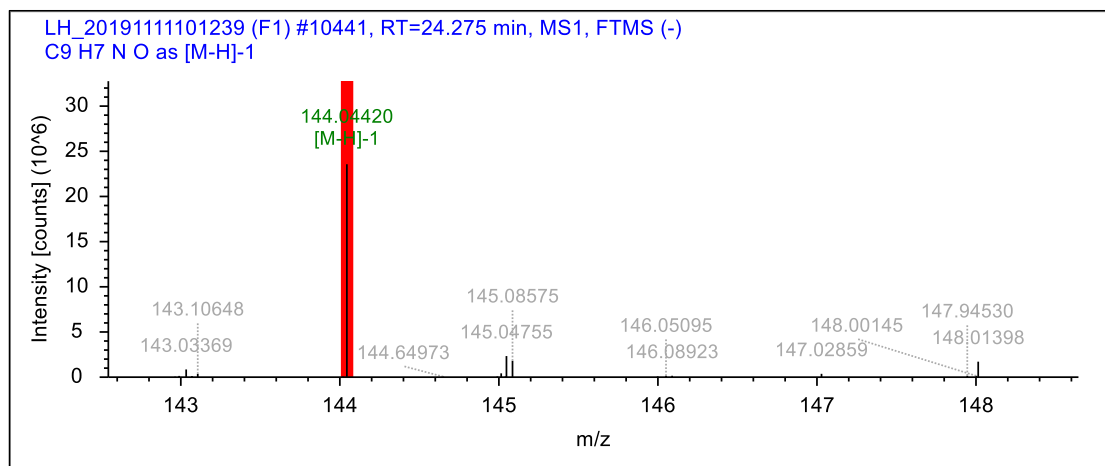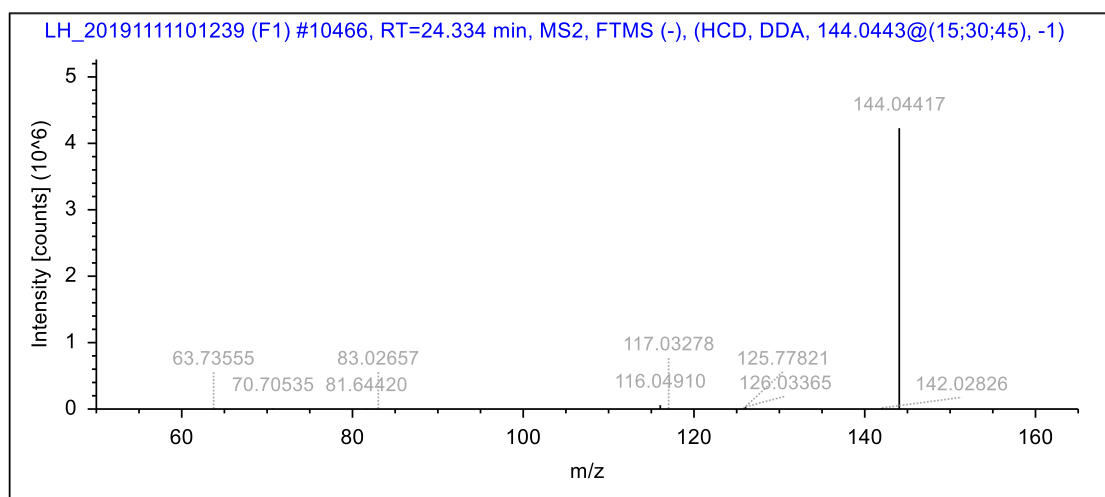

## Peak 23

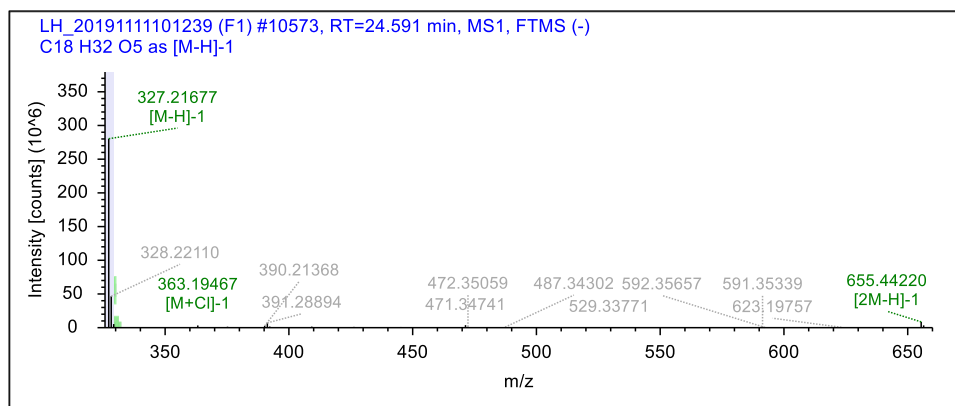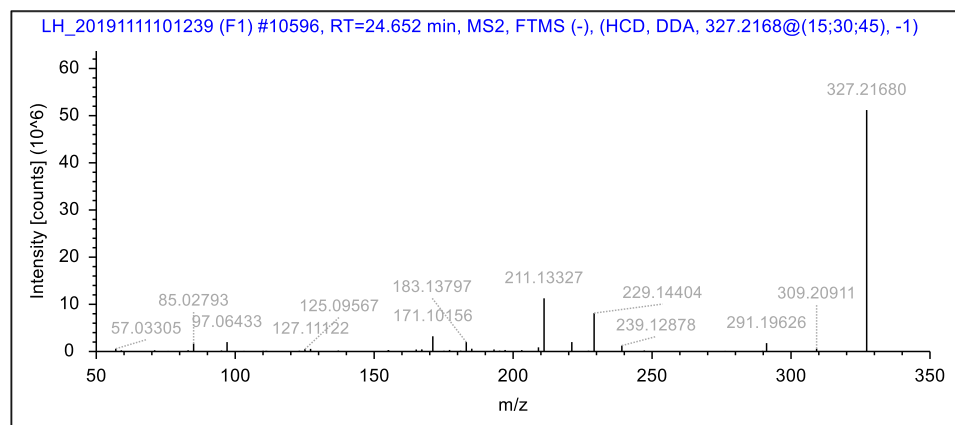

Supplement: s1 [file s1]
